# Supplementary material
Source: PubMed Central journal article supplement (PMC9090997)
Supplement: NIHMS1799082-supplement-1.pdf [file NIHMS1799082-supplement-1.pdf]

Figure S1

**A**

| Donor ID | Age | Number of filtered cells | Median genes / cell |
|----------|-----|--------------------------|---------------------|
| Young_1  | 17  | 2751                     | 2519                |
| Young_2  | 22  | 3739                     | 2519                |
| Young_3  | 22  | 3446                     | 2507                |
| Young_4  | 21  | 3220                     | 1937                |
| Older_1  | 66  | 3971                     | 2441                |
| Older_2  | 66  | 3423                     | 3039                |
| Older_3  | 66  | 4488                     | 2574                |
| Older_4  | 62  | 5058                     | 2741                |
| Older_5  | 66  | 3405                     | 2769                |
| Older_6  | 64  | 4122                     | 2768                |
| Older_7  | 76  | 3220                     | 1937                |
| Older_8  | 67  | 3814                     | 2847                |

**B**

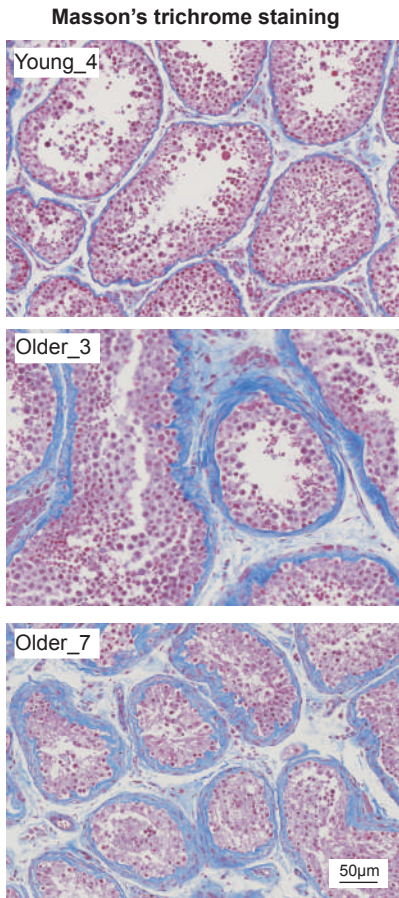

**C**

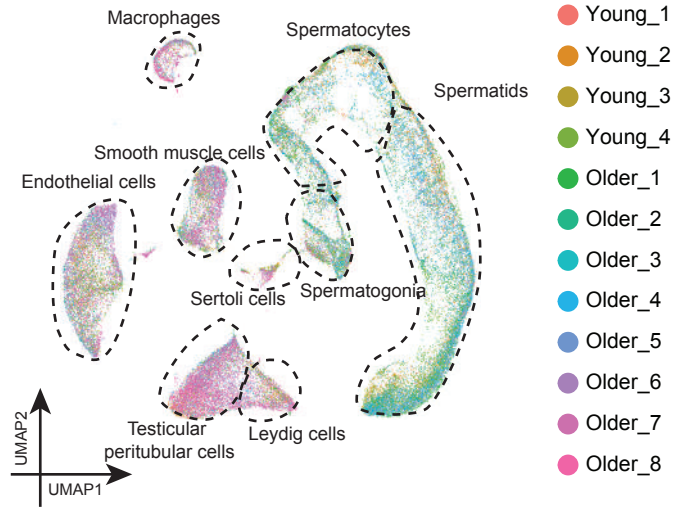

**D**

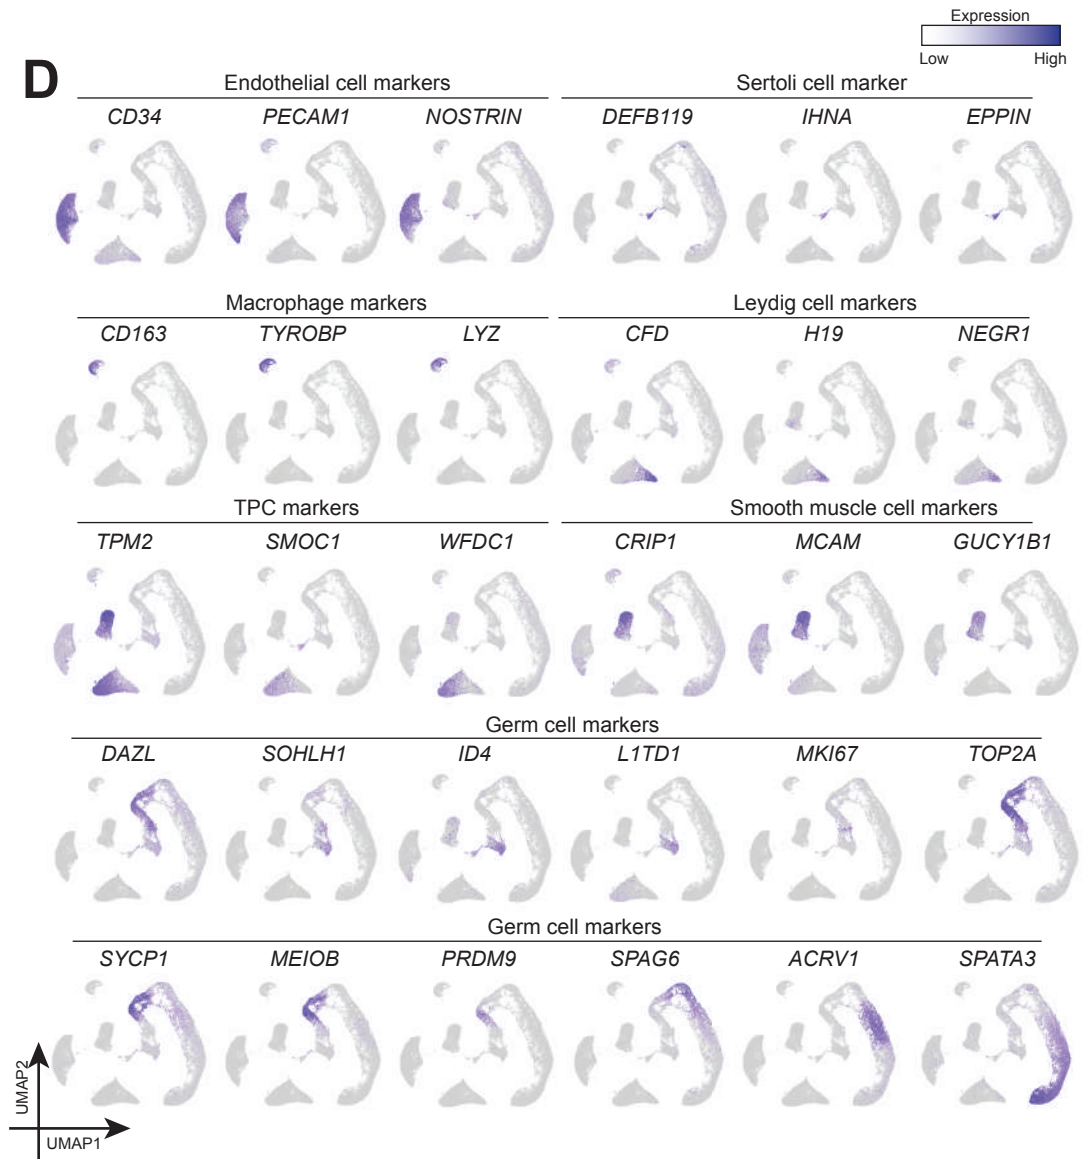

**Figure S1. Information about donors and quality control of scRNA-seq**

- (A) Information summary of 12 donors sequenced in this study.
- (B) UMAP plot showing major testicular cell types with color according to the donors of origin.
- (C) Low magnification of the sections in Fig 1B, showing a thicker wall of seminiferous tubules and more ECM in interstitial tissues in older testis. The boxed regions represent the part of the area shown at the higher magnification in Fig 1B. Scale bar, 50  $\mu\text{m}$ .
- (D) Expression of additional markers identifying major testicular cell types cast on the UMAP plot. Purple (or grey) represent high (or low) expression level as shown on the color key on top right.

Related to Figure 1.

Figure S2

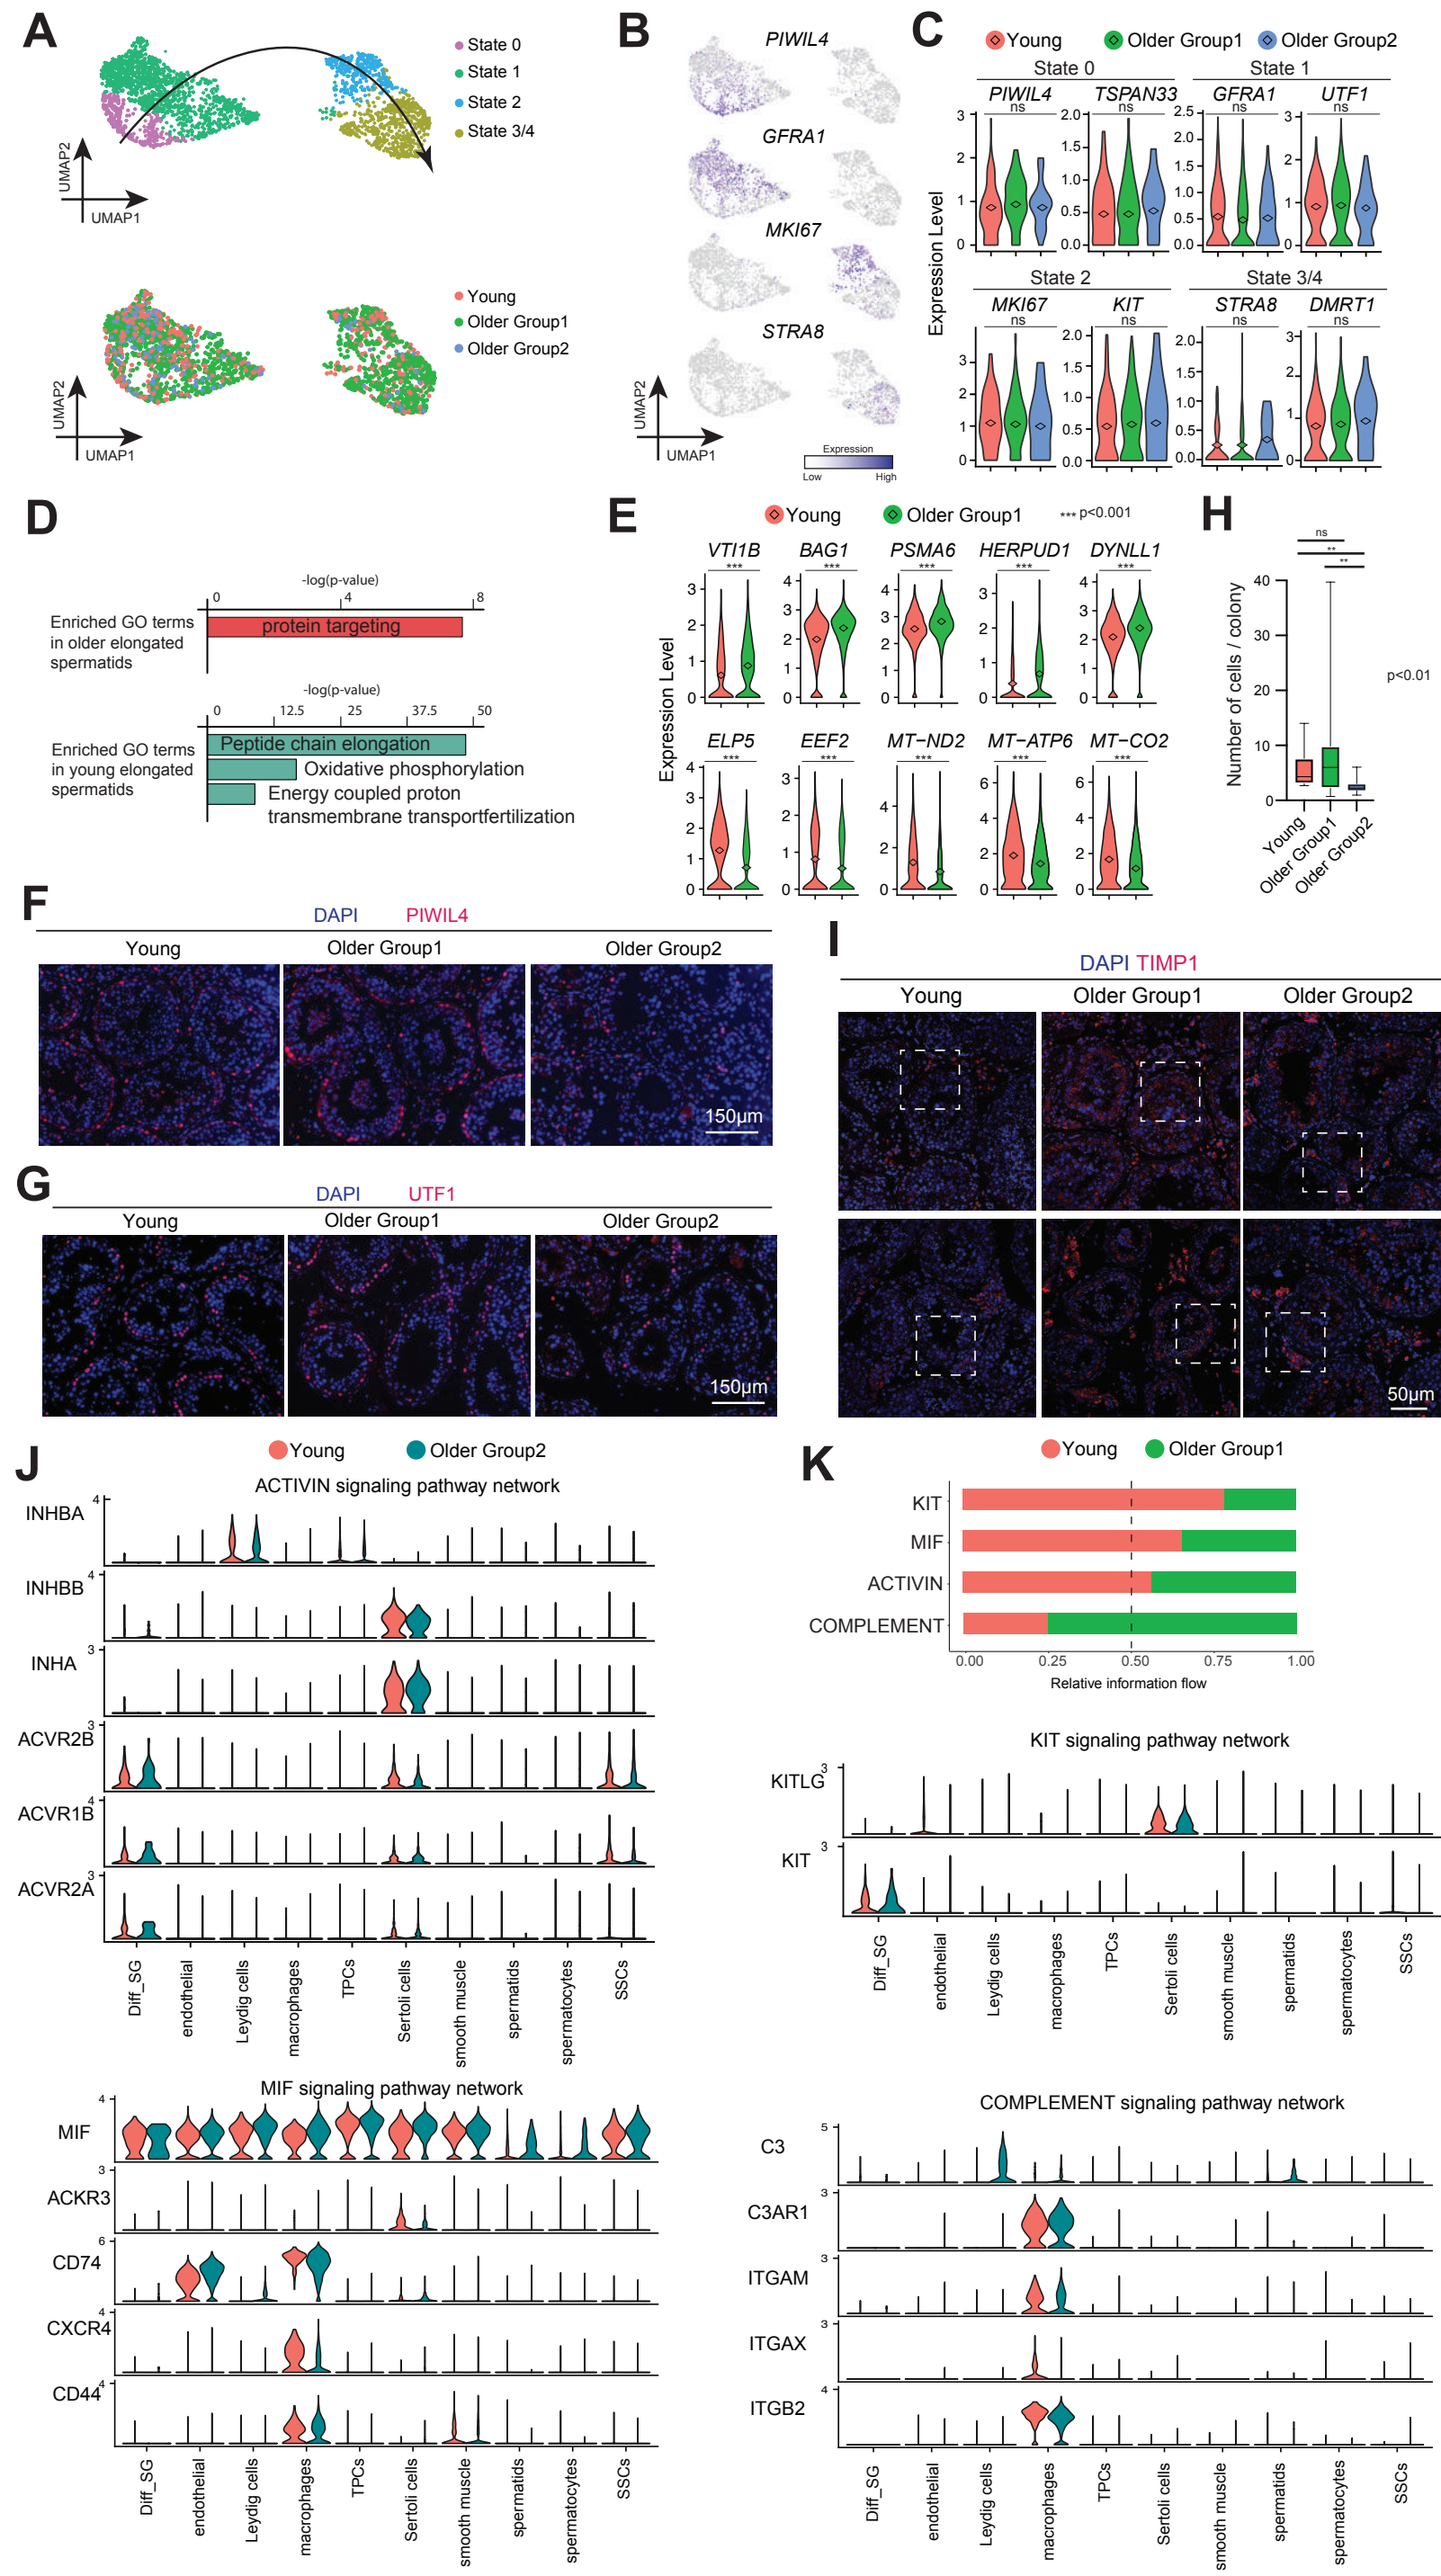

**Figure S2. Transcriptomic analysis of germ cells and cell-cell communication between young and older testis**

- (A) UMAP plots showing focused analysis of spermatogonia from Fig 2A. Top: Cells are colored according to five discrete cellular states (States 0 to 4) as described in Guo et al., 2018. The arrow points to the development direction of spermatogonia. Bottom: Cells are colored according to Young versus Older Groups.
- (B) Expression of selected markers identifying major cellular states of spermatogonia cast on the UMAP plot. Purple (or grey) represents a high (or low) expression level.
- (C) Violin plots showing almost no difference among different groups for each state. The diamond inside the violin plot represents the mean.
- (D) Bar plots showing upregulated (top) or downregulated (bottom) GO terms enriched in the DEGs of elongated spermatids when comparing Older Group1 to Young.
- (E) Violin plots showing upregulated DEGs of older elongated spermatids on the top panel and downregulated DEGs of older elongated spermatids on the bottom panel. The diamond inside the violin plot represents the mean.
- (F) Low magnification of the sections in Fig 2E. Scale bar, 150  $\mu\text{m}$ .
- (G) Low magnification of the sections in Fig 2F. Scale bar, 150  $\mu\text{m}$ .
- (H) Boxplot showing the average number of cells per colony for each replicate (left/right testis) in the three different age groups.  $**p < 0.01$  (two-tailed t-test).
- (I) Low magnification of the sections in Fig 3C. The boxed regions represent the part of the area shown at the higher magnification in Fig 3C. Scale bar, 50  $\mu\text{m}$ .
- (J) Violin plots showing expression distribution of Activin / KIT / MIF / Complement signaling genes inferred by CellChat.
- (K) Bar graph (by CellChat analysis) illustrating representative information flow in Older Group1 (green) and Young (red).

Related to Figure 2 and 3.

Figure S3

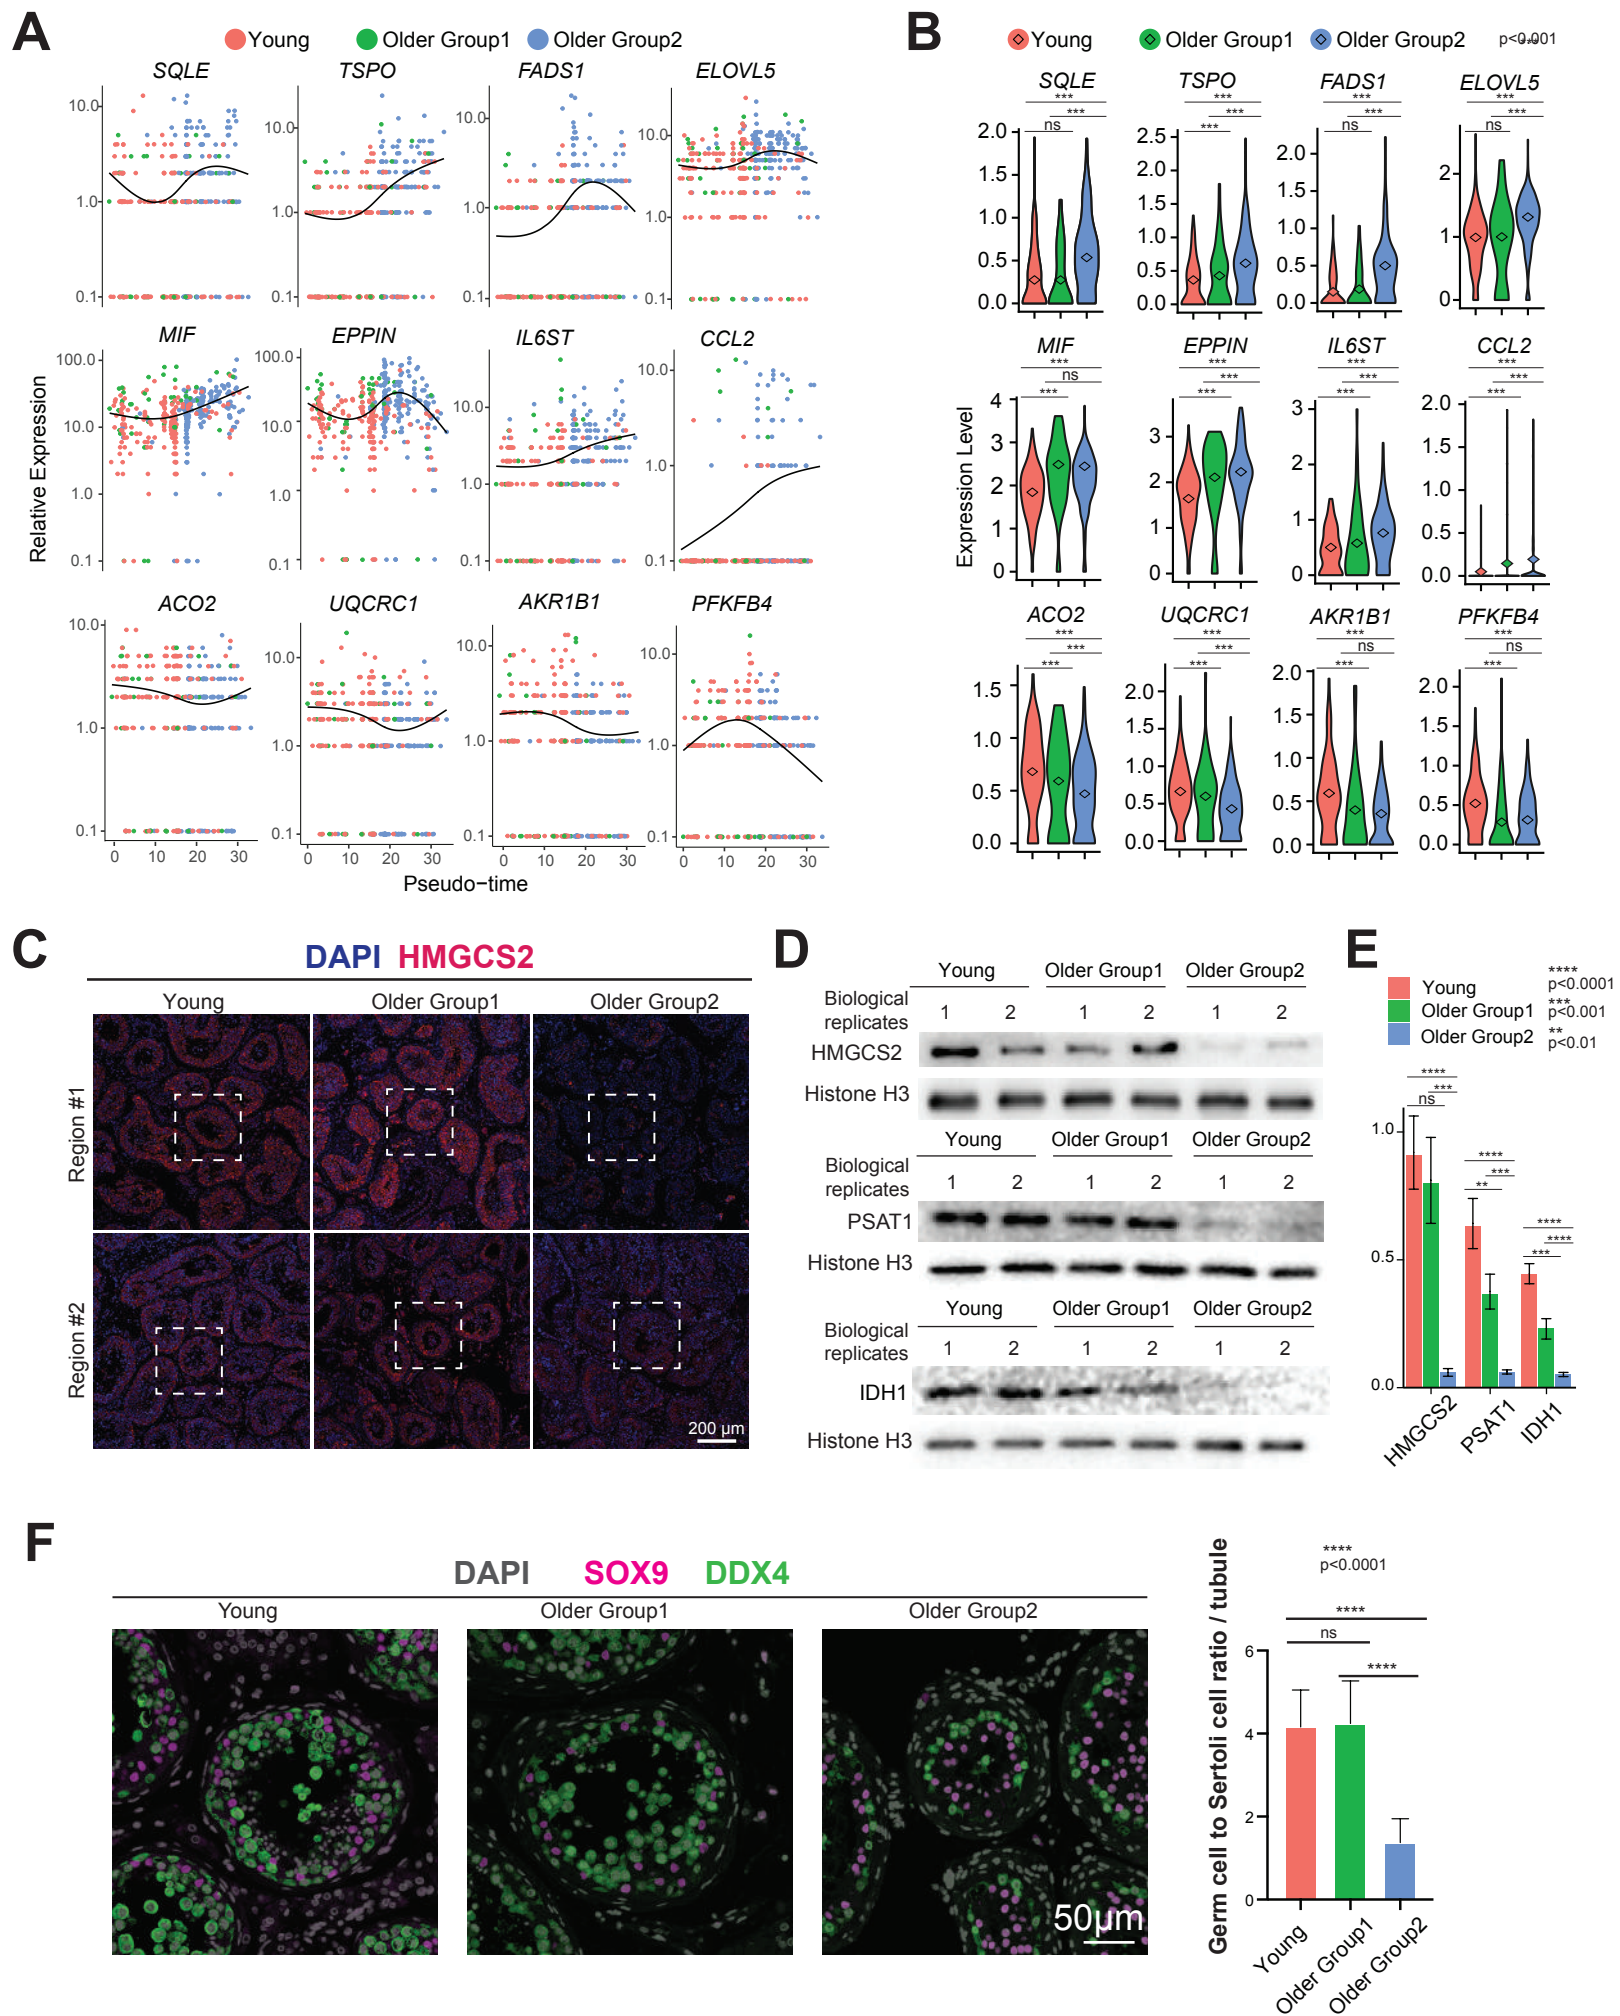

**Figure S3. Gene expressions related to metabolism and inflammation in older Sertoli cells**

- (A) Expression levels of selected genes during Sertoli cell aging. The x-axis represents pseudotime as defined in Fig 4B, and the y-axis represents gene expression levels.
- (B) Violin plots showing expression levels of selected genes in Fig S3A during Sertoli cell aging. The diamond inside the violin plot represents the mean.
- (C) Low magnification of the sections in Fig 4F. The boxed regions represent the part of the area shown at the higher magnification in Fig 4F. Scale bar, 200  $\mu\text{m}$ .
- (D) Western blots of HMGCS2, PSAT1, and IDH1. Histone H3 was used for normalization. Total proteins were prepared from whole testicular tissues. Two biological replicates were used for each group.
- (E) Bar plots showing the quantification in Fig S3D. Each bar includes the data derived from 2 biological replicates and 2 technical replicates.
- (F) Immunofluorescence images of a Sertoli cell marker, SOX9 (magenta) and a germ cell marker, DDX4 (green) in different groups (Young, Older Group1, and Older Group2). Nuclei were counterstained with DAPI (grey). On the left is quantification of germ cell to Sertoli cell ratio per cross-section of seminiferous tubule in different groups, showing a decreased germ cell to Sertoli cell ratio in Older Group2. Bars represent the mean with SD of 20 independent tubules per group.  $n = 6$  human samples. \*\*\*\* $p < 0.0001$  (two-tailed t-test). Scale bar, 50  $\mu\text{m}$ .
- Related to Figure 4.

Figure S4

**A** ● Young ● Older Group1 ● Older Group2 \*\*\*p<0.001

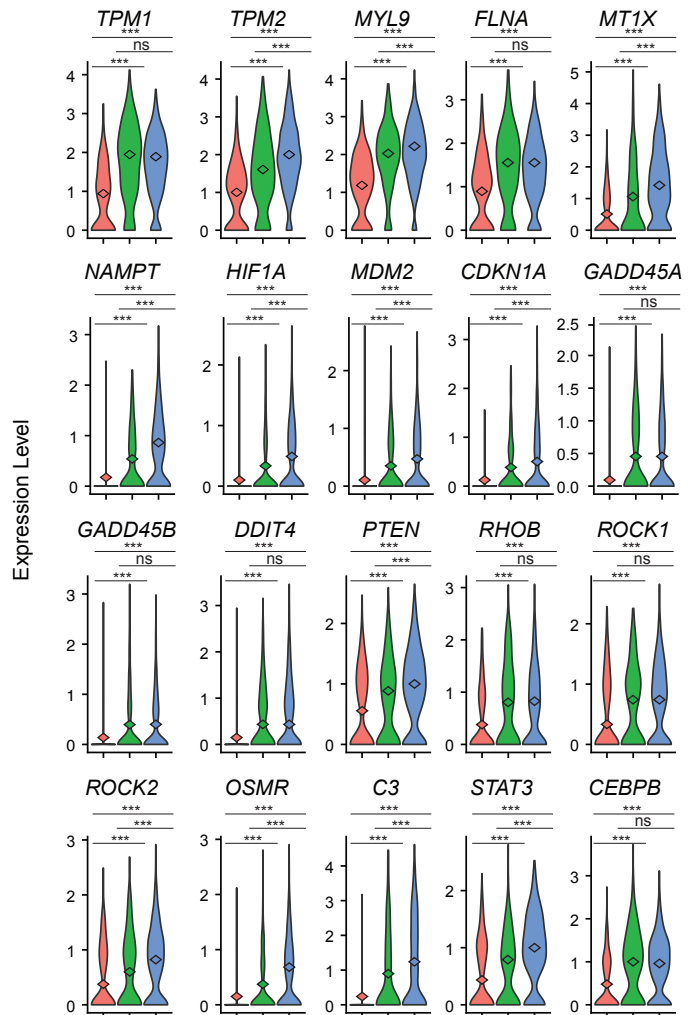

**B**

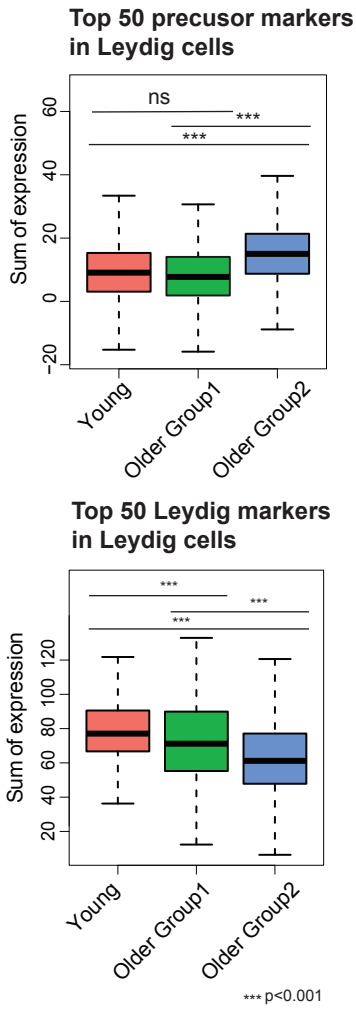

**C**

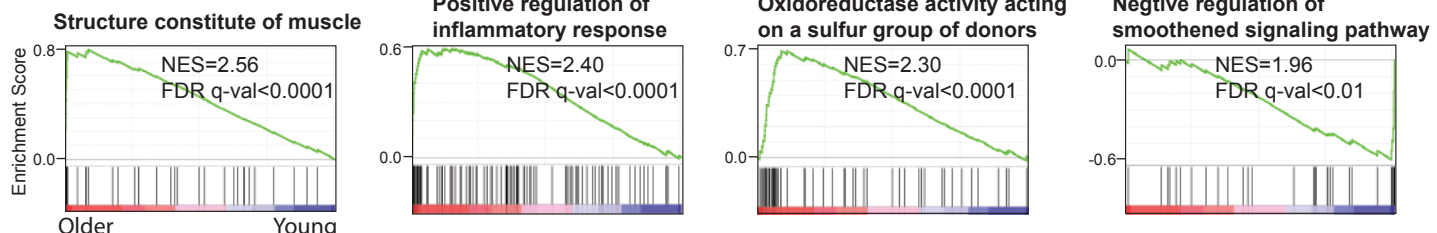

**D** HH signaling pathway

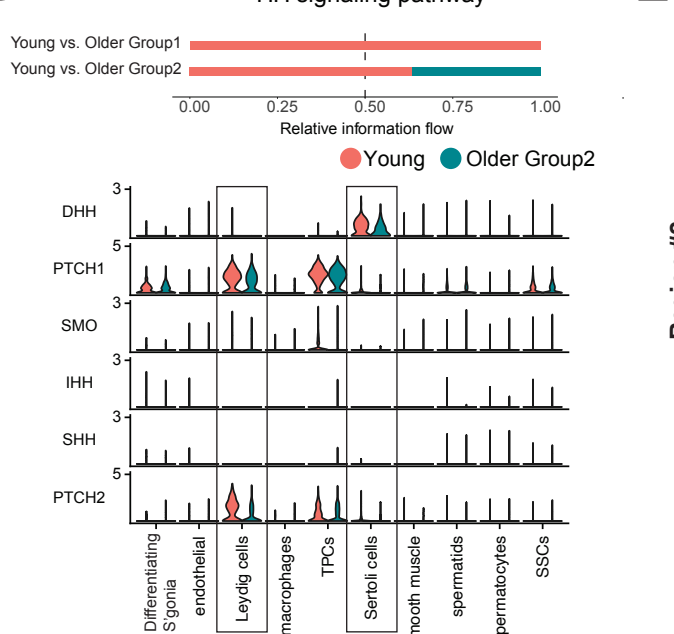

**E**

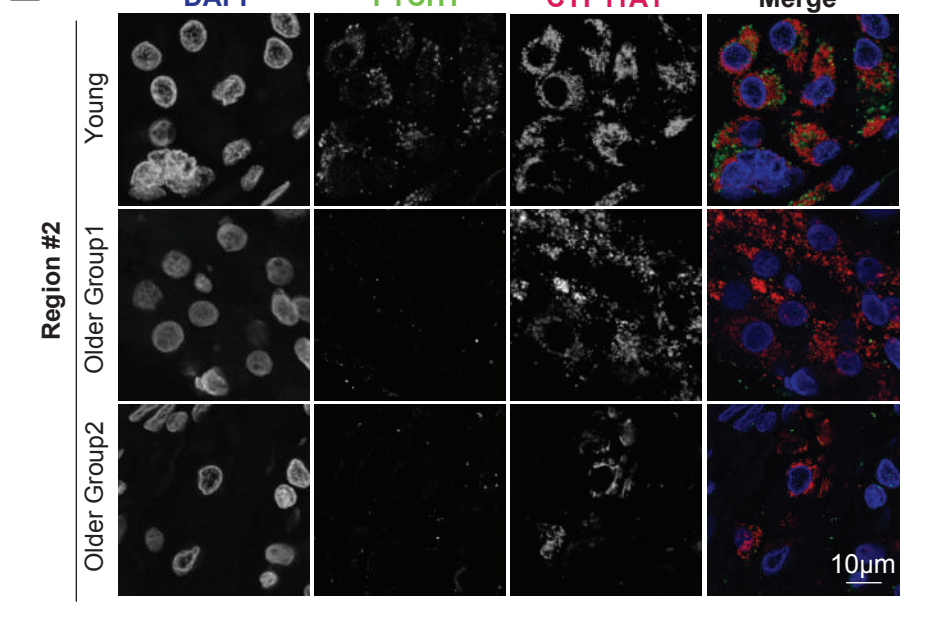

#### **Figure S4. Signaling pathways are altered in older Leydig cells**

- (A) Violin plots showing upregulated (left) and downregulated (right) DEGs of older Leydig cells. The diamond inside the violin plot represents the mean.
- (B) Overall expression levels of top 50 Leydig/TPC progenitor genes (left) or Leydig genes (right) in Leydig cells of different groups (Young, Older Group1, and Older Group2). Leydig cells of Older Group2 showed a statistically significant increase in the overall expression of Leydig/TPC progenitor genes. Leydig cells of Older Group 1 and 2 showed a progressively decreased expression of Leydig cell markers compared to Young. \*\*\* $p < 0.001$  (Wilcoxon test).
- (C) Gene Set Enrichment Analysis (GSEA) of Leydig cells in young and older testis. Representative enrichment plots are shown with significant GO terms on the top that correlated with older (red, left) or young (blue, right) Leydig cells. The peak of the green curves (enrichment score curve) on the red (left) side or the blue (right) side represent a positive or negative correlation with Older Leydig cells, respectively. Normalized enrichment score (NES) and Q-value are listed within each plot.
- (D) Top: Bar graph analyzed by CellChat illustrating representative information flow in Older and Young. Bottom: Violin plot showing expression distribution of HH signaling genes inferred by CellChat.
- (E) Independent experiments of Fig 5D using additional 3 human samples. Scale bar, 10  $\mu\text{m}$ .  
Related to Figure 5.



Figure S5

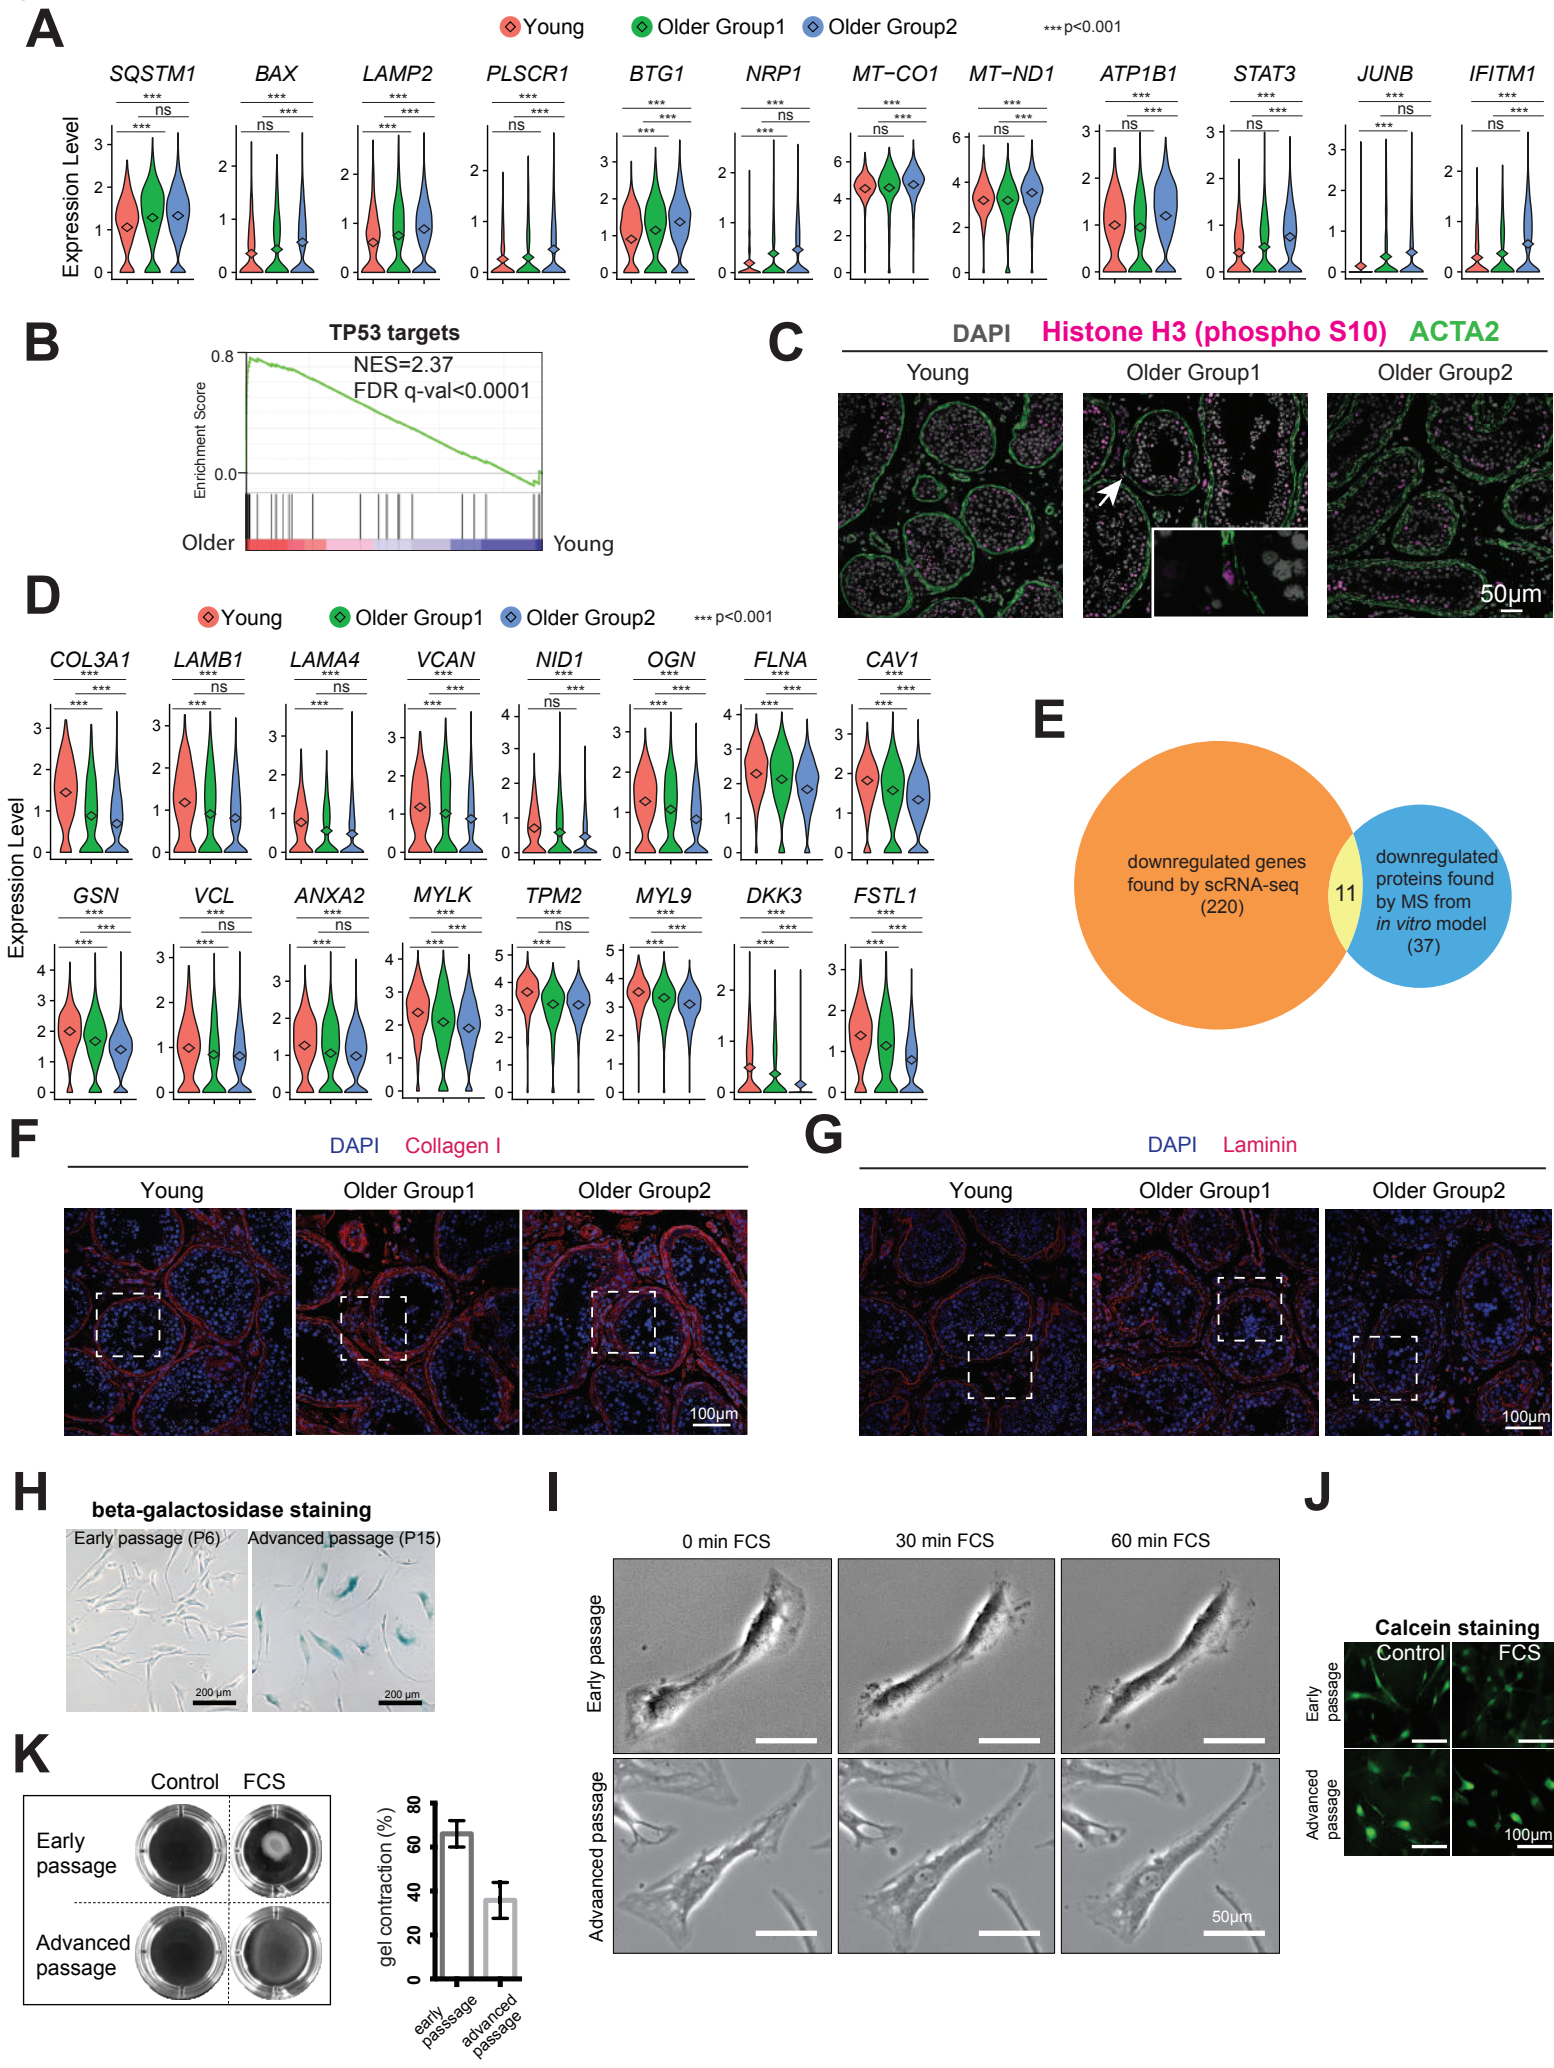

**Figure S5. Disruption in ECM homeostasis in the testis of older men caused by TPCs and reduced contractile abilities**

- (A) Violin plots showing upregulated DEGs of older TPCs. The diamond inside the violin plot represents the mean.
- (B) GSEA of TPCs in young and older testis. Representative enrichment plots are shown with significant GO terms on the top that correlated with older (red, left) or young (blue, right) TPCs. The peak of the green curves (enrichment score curve) on the red (left) side or the blue (right) side represent a positive or negative correlation with older TPCs, respectively. Normalized enrichment score (NES) and q-value are listed within each plot.
- (C) Immunofluorescence images of phospho-Histone H3 (Magenta) with a TPC marker, ACTA2 (green) in different groups (Young, Older Group1, and Older Group2), revealing very few TPCs undergo proliferation. Nuclei were counterstained with DAPI (grey). Arrows indicate a double-positive cell, and a zoom-in figure of the double-positive cell is presented on the bottom right. n = 6 human samples. Scale bar, 50  $\mu$ m.
- (D) Violin plots showing downregulated DEGs of older TPCs. The diamond inside the violin plot represents the mean.
- (E) Venn diagram illustrates 11 shared genes/proteins downregulated in scRNA-seq of this study and secreted proteomics data from *in vitro* senescence model of HPTCs via MS reported by Schmid et al.
- (F) Low magnification of the sections in Fig 6G. The boxed regions represent the part of the area shown at the higher magnification in Fig 6G. Scale bar, 100  $\mu$ m.
- (G) Low magnification of the sections in Fig 6H. The boxed regions represent the part of the area shown at the higher magnification in Fig 6H. Scale bar, 100  $\mu$ m.
- (H) Staining of senescence associated beta-galactosidase of cells in early (P6) and advanced passage (P15). Note that cell size was increased in most cells in P15. Scale bar, 200  $\mu$ m.
- (I) Phase-contrast micrographs of TPCs in early (above, P5) and advanced (below, P15) passages. Cells were monitored for 1 h during treatment with 30% FCS. A time-dependent contraction of individual cells was observed. Considerable reductions of cell surface area are visible in cells in an early passage, in contrast to small changes in cells of an advanced passage. Scale bar, 50  $\mu$ m.
- (J) Example of evaluation of viability of cells in collagen gels directly after gel contraction assay using Calcein AM. Fluorescent cells were scored as alive. Scale bar, 100  $\mu$ m.
- (K) Example of a collagen gel contraction assay for 24 h with TPCs of an early (P5) and advanced (P16) passage. Massive reduction of gel area of early passage after treatment with 30% FCS for 24 h, in advanced passage only slight reduction of the gel area is visible. Gel area remains nearly unchanged under control conditions. On the left is quantification of collagen gel contraction with TPCs after treatment with 30% FCS for 24 h (n = 4). Note massive reduction of gel area of early passages. In contrast, the corresponding cells in an advanced passage have a significantly reduced ability to contract. Bars represent the mean with SD, statistical significance denoted with asterisks (\* p < 0.05, t-test). Results from corresponding cells of different passages are connected with a line.

Related to Figure 6.

Figure S6

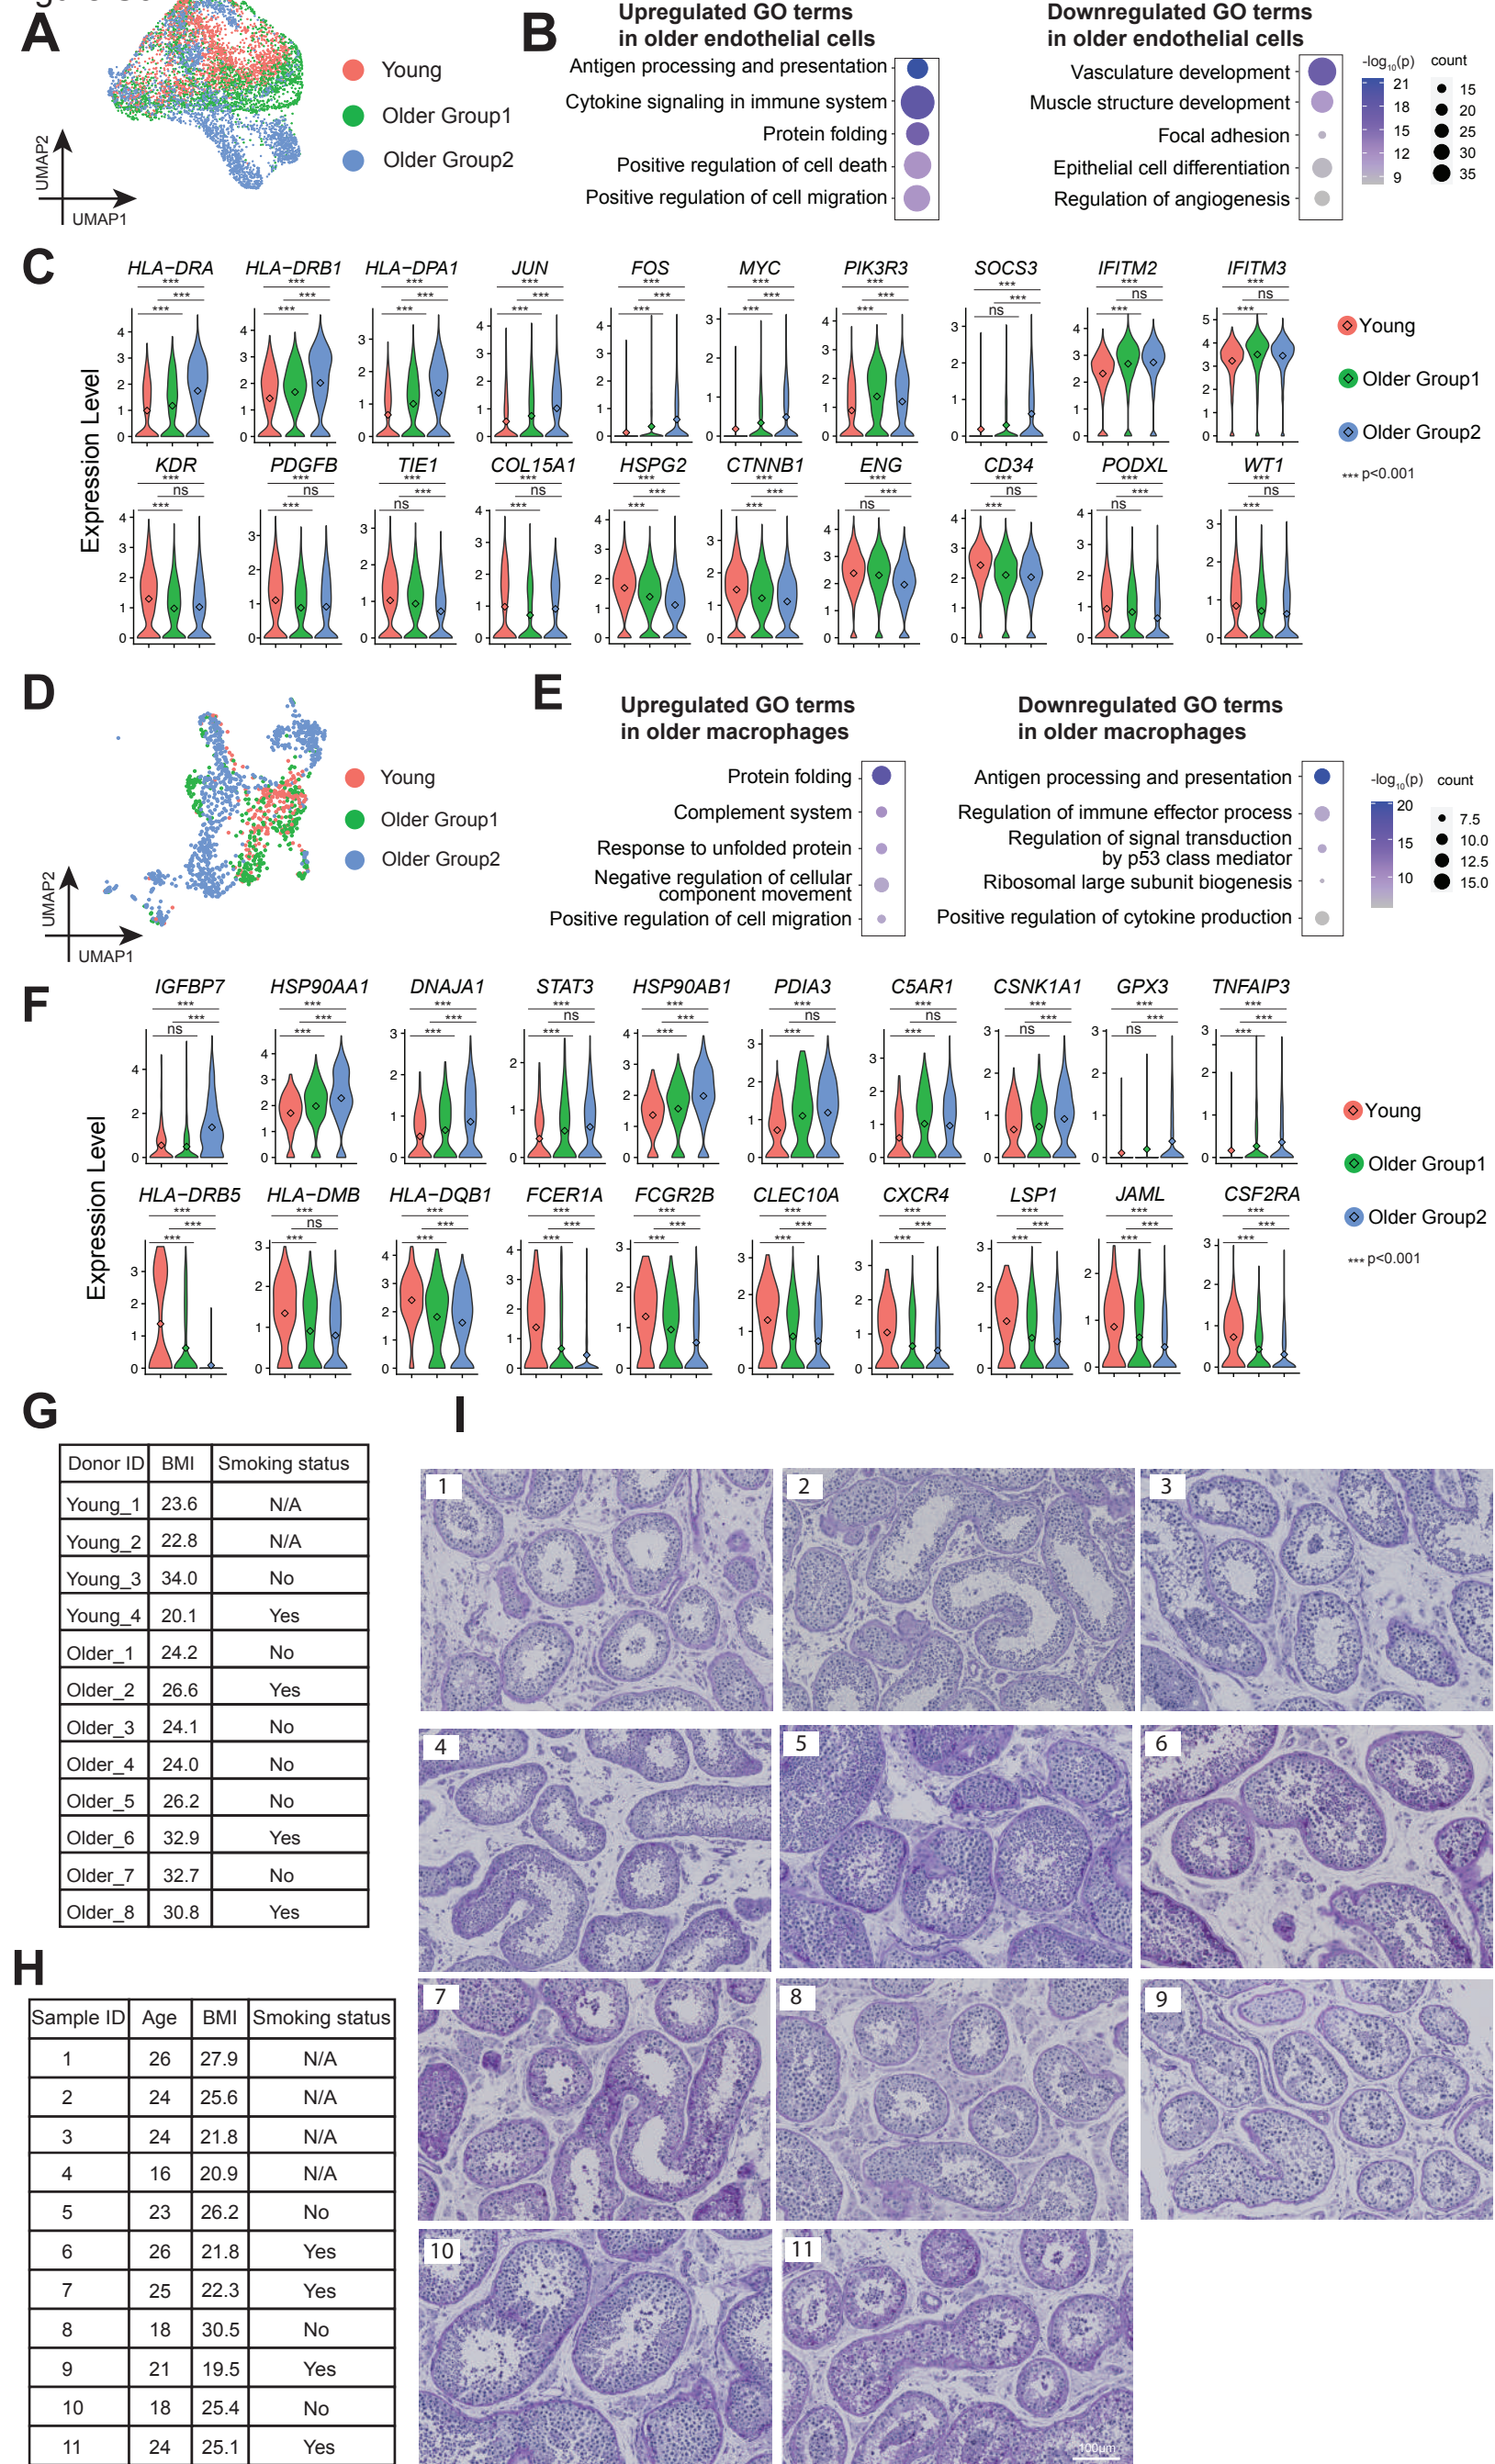

**Figure S6. Aging-associated changes in testicular endothelial cells and macrophages and testicular histology of donors with varying body mass index (BMI) and smoking status**

- (A) UMAP plot showing focused analysis of endothelial cells from Fig 1C.
  - (B) Dot plots showing the top 5 upregulated or downregulated GO terms enriched in the DEGs in older endothelial cells with p-value and gene numbers.
  - (C) Violin plots showing upregulated DEGs of older endothelial cells within the top panel and downregulated DEGs of older endothelial cells within the bottom panel. The diamond inside the violin plot represents the mean.
  - (D) UMAP plot showing focused analysis of macrophages from Fig 1C.
  - (E) Dot plots showing the top 5 upregulated or downregulated GO terms enriched in the DEGs in older macrophages with p-value and gene numbers.
  - (F) Violin plots showing upregulated DEGs of older macrophages within the top panel and downregulated DEGs of older macrophages within the bottom panel. The diamond inside the violin plot represents the mean.
  - (G) BMI and smoking status of donors who contributed to the single-cell transcriptome profile in Fig 1A.
  - (H) BMI and smoking status of 11 young donors other than donors contributing to the single-cell transcriptome profile in Fig 1A.
  - (I) Periodic acid–Schiff (PAS) staining of testis sections from donors in Fig S6H.
- Related to Figure 6.
